# Supplementary material
Source: publisher site journal article supplement (https://www.dovepress.com/get_supplementary_file.php?f=479137.docx)
Supplement: Supplementary file 1 [file get_supplementary_file.php]

Table S1

| **Tested compound** | **IFN-γ**  **(Mean ± SEM)** | **TNF-α**  **(Mean ± SEM)** | **IL-6**  **(Mean ± SEM)** | **IL-4**  **(Mean ± SEM)** |
| --- | --- | --- | --- | --- |
| **Les-3288** |  |  |  |  |
| 0 μg/mL | 9 064 ± 385 | 147 ± 39 | 4 026 ± 237 | 53 ± 15 |
| 0.01 μg/mL | 8 981 ± 275 | 125 ± 37 | 3 883 ± 243 | 49 ± 12 |
| 0.1 μg/mL | 7 928 ± 856 | 112 ± 39 ***** | 3 778 ± 231 | 41 ± 11***** |
| 1 μg/mL | 3 509 ± 855 ****** | 17 ± 3 ****** | 2 631 ± 338 ****** | 13 ± 2 ****** |
|  |  |  |  |  |
| **Les-3288 A24-PEG550** |  |  |  |  |
| 0 μg/mL | 6 001 ± 179 | 147 ± 39 | 3 046 ± 103 | 40 ± 11 |
| 0.01 μg/mL | 5 957 ± 212 | 119 ± 28 | 2 826 ±119 ***** | 33 ± 12 |
| 0.1 μg/mL | 5 667 ± 273 ****** | 143 ± 35 | 2 835 ± 104 ****** | 31 ± 10 ***** |
| 1 μg/mL | 5709 ± 262 | 118 ± 28 | 2 898 ± 110 | 29 ± 9 ****** |
|  |  |  |  |  |
| **Les-3288 A24-PEG750** |  |  |  |  |
| 0 μg/mL | 1 294 ± 13 | 481 ± 55 | 865 ± 11 | 37 ± 10 |
| 0.01 μg/mL | 1 332 ± 13 | 481 ± 42 | 829 ± 11 ***** | 32 ± 12 |
| 0.1 μg/mL | 1 301 ± 6 | 466 ± 67 | 830 ± 9 ****** | 33 ± 10 ***** |
| 1 μg/mL | 1 306 ± 17 | 452 ± 64 | 848 ± 13 | 35 ± 9 |

Table S2

| **Tested compound** | **IFN-γ**  **(Mean ± SEM)** | **TNF-α**  **(Mean ± SEM)** | **IL-6**  **(Mean ± SEM)** | **IL-4**  **(Mean ± SEM)** |
| --- | --- | --- | --- | --- |
| **Les-3833** |  |  |  |  |
| 0 μg/mL | 9 064 ± 385 | 147 ± 39 | 4 026 ± 237 | 53 ± 15 |
| 0.005 μg/mL | 9 115 ± 385 | 109 ± 28 ***** | 3 994 ± 258 | 41 ± 12 ****** |
| 0.01 μg/mL | 8 900 ± 466 | 110 ± 35 | 4 026 ± 291 | 42 ± 12***** |
| 0.1 μg/mL | 8 816 ± 619 | 111 ± 25 ***** | 3 781 ± 232 | 41 ± 12 ****** |
|  |  |  |  |  |
| **Les-3833 A24-PEG550** |  |  |  |  |
| 0 μg/mL | 6 001 ± 179 | 781 ± 112 | 3 046 ± 103 | 40 ± 11 |
| 0.005 μg/mL | 5 876 ± 257 | 724 ± 135 | 3 194 ± 91 ***** | 36 ± 13 |
| 0.01 μg/mL | 5 800 ± 150 | 691 ± 119 | 3 058 ± 85 | 31 ± 9 ****** |
| 0.1 μg/mL | 5 767 ± 212 ***** | 633 ± 97 ****** | 2 965 ± 100 | 31 ± 10 ***** |
|  |  |  |  |  |
| **Les-3833 A24-PEG750** |  |  |  |  |
| 0 μg/mL | 1 294 ± 13 | 481 ± 55 | 865 ± 11 | 37 ± 10 |
| 0.005 μg/mL | 1 314 ± 15 | 477 ± 55 | 852 ± 14 | 35 ± 12 |
| 0.01 μg/mL | 1 791 ± 488 | 475 ± 43 | 857 ± 9 | 38 ± 12 |
| 0.1 μg/mL | 1 294 ± 10 | 481 ± 53 | 849 ± 11 ***** | 34 ± 11 |

Table S3

| **Tested compound** | **IFN-γ**  **(Mean ± SEM)** | **TNF-α**  **(Mean ± SEM)** | **IL-6**  **(Mean ± SEM)** | **IL-4**  **(Mean ± SEM)** |
| --- | --- | --- | --- | --- |
| **PEGMA DMM** |  |  |  |  |
| 0 μg/mL | 9 064 ± 385 | 781 ± 112 | 4 026 ± 237 | 53 ± 15 |
| 0.01 μg/mL | 8 819 ± 338 | 771 ± 130 | 3 670 ± 224 ***** | 53 ± 13 |
| 0.1 μg/mL | 8 683 ± 318 | 708 ± 114 | 3 590 ± 185 ****** | 53 ± 16 |
| 1 μg/mL | 8 783 ± 299 | 652 ± 92 ***** | 3 485 ± 195 ****** | 45 ± 12 |
|  |  |  |  |  |
| **A24-PEG550** |  |  |  |  |
| 0 μg/mL | 6 001 ± 179 | 781 ± 112 | 3 046 ± 103 | 40 ± 11 |
| 0.01 μg/mL | 5 894 ±207 | 611 ± 103 ***** | 2 927 ± 93 | 32 ± 11 ***** |
| 0.1 μg/mL | 5 581 ± 208 ***** | 740 ± 113 | 2 891 ± 87 ***** | 32 ± 10 ****** |
| 1 μg/mL | 5 885 ± 125 | 661 ± 114 ***** | 2 862 ± 83 ***** | 32 ± 11 ****** |
|  |  |  |  |  |
| **A24-PEG750** |  |  |  |  |
| 0 μg/mL | 1 294 ± 13 | 481 ± 55 | 865 ± 11 | 37 ± 10 |
| 0.01 μg/mL | 1 291 ± 20 | 489 ± 42 | 846 ± 12 ***** | 30 ± 12 |
| 0.1 μg/mL | 1 303 ± 15 | 470 ± 62 | 841 ± 13 ***** | 33 ± 10 ***** |
| 1 μg/mL | 1 280 ± 12 | 442 ± 69 | 842 ± 11 ***** | 35 ± 10 |

Table S1: The effect of binding Les-3288 to the polymeric nanocarriers on in vitro production of cytokines IFN-γ, TNF-α, IL-6 and IL-4 in cell culture supernatants

Legend:

Cytokines were measured in phytohemagglutinin stimulated human peripheral blood cell culture supernatants (n = 8–9) using the ELISA method. Blood was exposed to Les-3288 – free drug in DMSO, complex Les-3288 А24-PEG550 and complex Les-3288 А24-PEG750 for 48h. Results are expressed in pg/mL; IFN – interferon, TNF – tumor necrosis factor, IL– interleukin; SEM - standard error of mean. Significance: *p < 0.05, **p < 0.01.

Table S2: The effect of binding Les-3833 to the polymeric nanocarriers on in vitro production of cytokines IFN-γ, TNF-α, IL-6 and IL-4 in cell culture supernatants

Legend:

Cytokines were measured in phytohemagglutinin stimulated human peripheral blood cell culture supernatants (n = 8–9) using the ELISA method. Blood was exposed to Les-3833 – free drug in DMSO, complex Les-3833 А24-PEG550 and complex Les-3833 А24-PEG750 for 48h. Results are expressed in pg/mL IFN – interferon, TNF- tumor necrosis factor, IL-interleukin; SEM - standard error of mean. Significance: *p < 0.05, **p < 0.01.

Table S3: The effect of polymeric nanocarriers on in vitro production of cytokines IFN-γ, TNF-α, IL-6 and IL-4 in cell culture supernatants

Legend:

Cytokines were measured in phytohemagglutinin stimulated human peripheral blood cell culture supernatants (n = 8–9) using the ELISA method. Blood was exposed to polymeric nanocarriers PEGMA-DMM, А24-PEG550 and А24-PEG750 for 48h. Results are expressed in pg/mL IFN – interferon, TNF- tumor necrosis factor, IL-interleukin; SEM - standard error of mean. Significance: *p < 0.05, **p < 0.01.
